# Supplementary material
Source: PubMed Central journal article supplement (PMC2878498)

## LEGEND OF SUPPLEMENTAL FIGURE

**Fig. S1: Effect of curcumin on basal and FGF2 induced NOS3 expression in different endothelial cells.** oFPAEC, HUVEC and UAEC (~60% confluence) were pretreated with curcumin at different doses for 1 hr and then with or without FGF2 (10 ng/ml) for an additional 24 h. Cellular extracts were harvested for eNOS and  $\beta$ -actin protein analyses via immunoblotting (B). Representative images of one typical experiment shown depict three independent experiments for oFPAEC and UAEC from different pregnant sheep, and for HUVEC from two independent experiments using HUVEC from different placentas. Quantitative data are expressed as the mean  $\pm$  SEM fold of controls. Bars with different superscripts differ significantly ( $p < 0.05$ ) and bars with two letters do not differ with these with either one letter.

Fig. S1

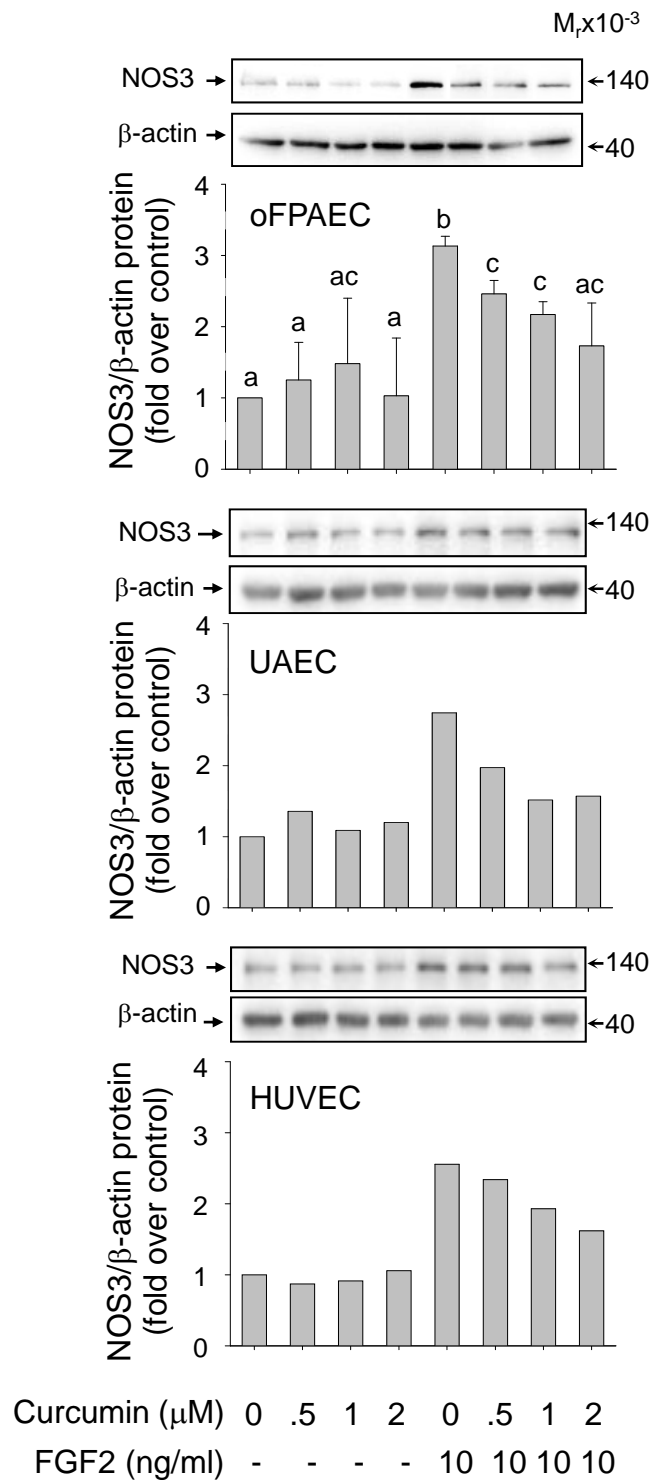

Supplement: supp_M109.092791_jbc.M109.092791-1.pdf [file supp_M109.092791_jbc.M109.092791-1.pdf]
